# Supplementary material for: Radiation-Induced Innate Neutrophil Response in Tumor Is Mediated by the CXCLs/CXCR2 Axis
Source: MDPI journal article supplement (doi:10.3390/cancers15235686), 2023-12-01
Supplement: s1 [file s1]

**Densitometry readings and ratios of western blot bands for Figure 5E.**

| Bands from left to right | Vinculin | IL-1 $\beta$ | IL-1 $\beta$ /Vinculin |
|--------------------------|----------|--------------|------------------------|
| 1                        | 8599.11  | 2127.99      | 0.25                   |
| 2                        | 8313.87  | 1140.87      | 0.14                   |
| 3                        | 8970.11  | 1667.70      | 0.19                   |
| 4                        | 8233.99  | 2839.58      | 0.34                   |
| 5                        | 9304.23  | 6257.82      | 0.67                   |
| 6                        | 6674.82  | 3038.79      | 0.46                   |
| 7                        | 6166.53  | 1483.06      | 0.24                   |
| 8                        | 7872.06  | 3929.41      | 0.50                   |
| 9                        | 5837.70  | 2143.28      | 0.37                   |
| 10                       | 9043.53  | 8910.06      | 0.99                   |
| 11                       | 8815.99  | 7476.41      | 0.85                   |
| 12                       | 5905.41  | 3670.70      | 0.62                   |
| 13                       | 7665.23  | 2298.70      | 0.30                   |
| 14                       | 6268.70  | 4547.53      | 0.73                   |

**Densitometry readings and ratios of western blot bands for Figure 5F.**

| Bands from left to right | Vinculin | IL-1 $\beta$ | IL-1 $\beta$ /Vinculin |
|--------------------------|----------|--------------|------------------------|
| 1                        | 6185.16  | 2503.65      | 0.40                   |
| 2                        | 7892.16  | 2370.96      | 0.30                   |
| 3                        | 7025.70  | 2406.79      | 0.34                   |
| 4                        | 7394.41  | 2057.75      | 0.28                   |
| 5                        | 8109.99  | 3470.99      | 0.43                   |
| 6                        | 7076.58  | 5849.28      | 0.83                   |
| 7                        | 7337.11  | 5532.89      | 0.75                   |
| 8                        | 6855.63  | 9825.94      | 1.43                   |
| 9                        | 6573.16  | 6197.31      | 0.94                   |
| 10                       | 8806.41  | 7144.99      | 0.81                   |
| 11                       | 7613.41  | 3852.23      | 0.51                   |
| 12                       | 7102.87  | 1929.87      | 0.27                   |
| 13                       | 8688.99  | 6662.11      | 0.77                   |
| 14                       | 8683.70  | 7152.11      | 0.82                   |
| 15                       | 8862.70  | 8012.36      | 0.90                   |
