# Supplementary material for: Radiation-Induced Innate Neutrophil Response in Tumor Is Mediated by the CXCLs/CXCR2 Axis
Source: Cancers (Basel). 2023 Dec 1;15(23):5686. doi: 10.3390/cancers15235686 (PMC10705172; doi:10.3390/cancers15235686)
Supplement: Supplementary file 1 [file cancers-15-05686-s001.zip]

Archive with 4 entries (4 files):
- Supplementary Materials S1_Figures.pdf
- Supplementary Materials S2_Original western blots_updated.pdf
- Supplementary Materials S3_Densitometry readings and radios of western blot bands.pdf
- Supplementary Materials S4_TPM values of the related biological processes.xlsx
