# Supplementary material for: Radiation-Induced Innate Neutrophil Response in Tumor Is Mediated by the CXCLs/CXCR2 Axis
Source: Cancers (Basel). 2023 Dec 1;15(23):5686. doi: 10.3390/cancers15235686 (PMC10705172; doi:10.3390/cancers15235686)
Supplement: Supplementary file 1 [file cancers-15-05686-s001.zip › Supplementary Materials S4_TPM values of the related biological processes.xlsx]

## Sheet: MC38 Cellular response to DNA d
Gene ID	Gene name	Con-03h-1	Con-03h-2	Con-03h-3	Con-03h-4	RT-03h-1	RT-03h-2	RT-03h-3	RT-03h-4	RT-12h-1	RT-12h-2	RT-12h-3	RT-12h-4	RT-24h-1	RT-24h-2	RT-24h-3	RT-24h-4	RT-03h_vs_Con_pval	RT-12h_vs_Con_pval	RT-24h_vs_Con_pval
ENSMUSG00000026831	1700007K13Rik	0	0.316927	0.423125	0.356243	1.02742	1.06917	0.892053	0.282327	0.623426	0.572097	0.870001	0.64953	0.48683	0.810863	0.47533	0.358931	0.0506882	0.0148805	0.103737
ENSMUSG00000020284	1810043G02Rik	5.81864	7.38208	8.58177	8.19458	8.38473	7.50777	8.5925	9.29905	8.4178	8.83769	8.43062	9.02392	6.55999	8.50029	9.74564	9.46646	0.241159	0.147074	0.300403
ENSMUSG00000035401	2210018M11Rik	6.01081	10.3626	12.0987	8.58755	12.6086	12.7654	13.6963	15.4354	14.2574	15.2827	12.9239	15.0562	10.9394	12.957	8.81771	11.5201	0.0352384	0.0221423	0.299858
ENSMUSG00000073684	2610002J02Rik	13.2529	19.2181	21.5385	16.5252	19.7687	19.2624	22.5509	20.5906	20.8544	25.3902	20.9647	20.0082	12.6207	14.3993	18.1765	17.8737	0.205856	0.107924	0.438819
ENSMUSG00000005871	Apc	4.58364	8.24622	8.4991	6.72912	9.06506	9.23798	9.36444	10.7423	8.61163	11.611	9.62458	12.452	8.03835	10.1339	4.15835	7.74161	0.0563827	0.0301861	0.754604
ENSMUSG00000034218	Atm	5.25882	9.23849	11.608	8.67569	13.4961	12.6807	12.8464	15.8004	14.163	16.4883	14.2531	16.3486	15.742	20.1188	8.42513	14.7747	0.0225706	0.00860729	0.0822977
ENSMUSG00000034266	Batf	3.73413	4.51165	4.48186	6.33329	4.90683	4.26722	4.5424	2.75173	4.54575	2.41265	4.81526	4.94989	3.24026	4.4372	5.09468	5.39942	0.408252	0.499159	0.77149
ENSMUSG00000030983	Bccip	51.2579	63.1447	67.2891	60.5654	64.499	66.1818	63.6713	72.5478	60.2622	70.1714	65.3227	56.9838	62.4613	56.4113	72.7433	69.1792	0.180866	0.578881	0.38688
ENSMUSG00000089929	Bcl2a1b	23.6596	32.6658	21.8899	31.8756	18.6164	11.0361	17.2509	11.3799	9.15277	8.99757	17.8177	9.46156	19.3888	22.8189	26.4558	25.3767	0.0107268	0.00425801	0.265979
ENSMUSG00000027381	Bcl2l11	4.52637	7.42155	9.14437	7.50749	12.0268	7.88598	10.2775	8.78715	8.73241	10.7394	9.07753	13.5936	9.16192	13.2507	10.6962	12.983	0.0972243	0.0613504	0.0186505
ENSMUSG00000061755	Bod1l	2.95209	6.19107	6.92781	5.82319	6.91476	6.42009	7.50393	9.01629	8.56567	10.4973	8.90474	10.1776	7.00808	11.4123	6.11296	9.18825	0.111631	0.0110296	0.0953879
ENSMUSG00000031628	Casp3	66.6364	81.6619	86.4134	67.7506	92.3845	122.513	92.8468	116.544	112.792	135.124	110.251	103.77	153.401	115.065	92.1759	118.115	0.0216793	0.00409614	0.0326419
ENSMUSG00000020326	Ccng1	67.3775	28.0703	31.4343	39.6563	58.8375	57.3878	54.197	44.9181	43.932	45.7554	52.6315	50.0206	51.0506	47.1728	41.0323	46.6167	0.271012	0.526874	0.630794
ENSMUSG00000033102	Cdc14b	4.65986	6.97375	8.68261	7.53687	6.69856	7.91314	7.82684	10.0831	10.7265	14.3183	10.934	11.2884	7.55016	10.2136	6.52743	8.86563	0.331849	0.00660327	0.298448
ENSMUSG00000023067	Cdkn1a	52.7757	65.293	62.395	52.3717	107.589	92.8416	120.44	86.3557	79.3468	74.9775	82.8081	73.8199	111.378	84.3514	99.3847	93.1783	0.00597569	0.0040072	0.00222119
ENSMUSG00000037628	Cdkn3	25.7376	35.3615	31.3796	25.0825	15.6336	18.5031	19.2259	40.4501	33.5329	44.7816	42.7019	35.8817	59.1628	43.8934	59.4142	45.1113	0.392994	0.035435	0.00673754
ENSMUSG00000028089	Chd1l	12.1371	20.092	19.4849	16.8268	16.6394	15.2602	18.2006	18.0069	17.6373	18.5043	19.0803	18.1428	11.8422	17.2062	14.9681	17.1488	0.95812	0.555838	0.439142
ENSMUSG00000078671	Chd2	3.59255	7.41386	7.3043	5.90862	6.92836	8.02383	9.01325	11.169	8.15389	10.6091	8.87753	9.24745	7.63527	10.9979	5.26447	8.48952	0.0746772	0.0288687	0.220609
ENSMUSG00000029238	Clock	3.54406	9.57706	9.40072	5.06605	8.6752	9.2673	10.1211	11.325	9.84121	11.7693	10.5026	10.4633	7.62371	9.50352	5.33909	8.53043	0.148315	0.0879268	0.651062
ENSMUSG00000026011	Ctla4	0.788447	1.64007	1.38806	1.92245	1.27043	1.0053	1.16061	0.71081	0.548806	1.1981	1.52515	0.786982	0.715598	1.12629	1.11248	1.43972	0.20828	0.243577	0.288965
ENSMUSG00000103326	Ctla4	0	0	0	0	0	0	0	0	0	0	0	0	0	0	0	0	NA	NA	NA
ENSMUSG00000024740	Ddb1	137.878	204.737	221.761	203.673	191.94	188.586	211.451	216.277	242.377	261.056	254.963	261.364	201.533	250.014	229.387	260.73	0.639007	0.038859	0.109207
ENSMUSG00000028630	Dyrk2	3.89773	4.65099	4.14485	3.31728	4.37998	5.29414	4.66849	6.28502	4.67723	6.76061	5.34203	4.70873	5.85921	4.30729	3.56674	4.88497	0.0690059	0.0610534	0.297318
ENSMUSG00000062762	Ei24	33.5211	42.8883	46.2246	46.0384	62.212	55.5405	60.8178	57.1368	52.5719	52.7827	58.6003	59.684	46.8571	51.4881	45.3291	52.9255	0.0054864	0.0111737	0.102501
ENSMUSG00000003549	Ercc1	11.4443	21.9587	21.6762	13.9205	18.3703	18.8916	19.531	24.7486	22.5861	22.6525	20.1111	20.8692	17.0879	15.9805	23.2045	19.4728	0.356269	0.207648	0.613123
ENSMUSG00000026048	Ercc5	2.33534	3.8083	5.32815	3.9327	4.67231	4.814	5.74264	7.07694	5.17481	6.28788	5.57456	5.45336	4.4864	6.19843	4.86538	4.96748	0.081877	0.0558021	0.134615
ENSMUSG00000033458	Fan1	1.08841	1.48638	1.66661	1.05046	1.31391	1.41324	1.91164	1.85374	1.53892	2.01125	1.61385	1.60824	1.41072	1.66608	1.15291	1.70784	0.210507	0.0980794	0.44769
ENSMUSG00000021461	Fancc	4.06365	8.08786	8.09848	7.2599	7.61576	5.1385	7.4928	6.69839	6.23497	7.62594	8.10477	7.56977	3.00129	6.55969	7.04448	5.98167	0.904338	0.651345	0.387331
ENSMUSG00000052934	Fbxo31	13.7464	10.9021	13.1269	12.2799	11.4759	14.3082	11.799	16.464	14.128	15.2096	13.8759	14.8913	12.7867	12.3793	14.7699	12.9425	0.487614	0.0381855	0.419105
ENSMUSG00000055401	Fbxo6	25.7393	30.5142	35.9399	35.046	33.3204	27.762	38.9736	34.0156	36.0792	32.1324	34.0862	38.3742	24.3334	29.0075	35.1296	28.976	0.621383	0.271446	0.476758
ENSMUSG00000061175	Fnip2	3.19585	7.05865	8.76603	7.06327	6.40716	6.52941	10.5656	9.84265	9.60927	15.0091	10.099	12.1743	8.09422	13.1657	6.51226	10.0374	0.301434	0.022408	0.16697
ENSMUSG00000048756	Foxo3	5.93022	7.95882	11.6956	8.62837	9.59657	12.2927	13.0261	14.9761	12.6053	17.167	12.4756	13.1441	11.7796	13.2569	9.12991	11.2925	0.0534535	0.0178089	0.109049
ENSMUSG00000048000	Gigyf2	15.3885	20.3709	27.0205	18.5931	20.938	34.0044	22.0313	27.242	33.7869	32.7825	27.4673	34.7388	33.4918	28.5303	21.7669	23.0063	0.191729	0.00923951	0.13252
ENSMUSG00000021639	Gtf2h2	19.7102	33.5022	33.408	23.9806	31.2007	28.6572	31.6	37.0411	33.6403	35.9908	34.1222	35.1418	23.4362	33.2688	33.7587	35.94	0.307561	0.132691	0.409607
ENSMUSG00000049932	H2afx	18.065	23.5768	23.6324	19.7728	13.2449	16.5169	16.7093	20.0144	19.2191	27.1199	23.1104	21.6871	11.7444	14.5962	20.12	16.3939	0.0561976	0.508965	0.0501151
ENSMUSG00000020228	Helb	4.41217	6.75596	7.05105	5.96272	9.45572	8.89399	9.66165	9.80042	8.52041	10.506	8.26639	9.876	8.62962	9.30145	7.71682	8.02535	0.00695553	0.0067346	0.0189001
ENSMUSG00000030451	Herc2	3.28897	6.09992	6.55199	5.42681	6.70259	7.23138	7.49724	8.91153	7.40821	9.33579	8.54844	9.40769	6.66481	8.95685	4.23134	6.13061	0.0467255	0.0111101	0.38046
ENSMUSG00000032119	Hinfp	4.98318	9.15113	9.37249	8.01199	9.12001	8.45444	11.8389	11.3555	12.5593	11.1314	10.3085	12.7445	7.31822	12.4508	9.25439	12.0178	0.129046	0.0237643	0.183201
ENSMUSG00000061436	Hipk2	4.57945	5.69811	5.98522	4.63106	6.20503	8.35248	7.59461	8.59545	5.37771	9.67651	7.35765	7.47665	12.333	8.03359	5.02401	6.86529	0.0115165	0.0772405	0.163638
ENSMUSG00000005413	Hmox1	71.5789	226.109	222.86	187.215	120.596	89.787	317.915	103.588	224.97	262.643	232.078	340.424	121.428	197.855	198.853	283.306	0.780771	0.101472	0.649957
ENSMUSG00000025261	Huwe1	23.3608	46.6629	57.27	46.4735	51.6672	46.4476	54.1998	53.6605	56.5878	64.448	62.1018	70.345	37.6413	69.6517	30.6792	48.7155	0.34649	0.061895	0.78149
ENSMUSG00000021690	Jmy	2.54459	4.16372	4.71405	3.63819	3.85736	4.23314	5.76004	4.39597	4.94505	6.0535	4.19175	5.42328	2.74996	4.37414	2.83499	3.83205	0.247701	0.0632132	0.620749
ENSMUSG00000030677	Kif22	29.0303	42.7098	48.1492	36.286	20.562	24.8378	22.8571	44.2744	45.7243	57.3026	53.7567	47.3862	46.4597	48.2212	56.5074	50.6784	0.165207	0.0575724	0.0629743
ENSMUSG00000060657	Marf1	4.87697	7.82484	9.85154	8.28935	9.09412	9.29038	10.2581	11.811	10.5593	12.0761	9.96183	11.457	7.47627	11.3819	7.28174	9.75357	0.105095	0.0420619	0.410742
ENSMUSG00000037570	Mcrs1	31.8053	42.5699	47.5156	40.9243	40.5211	44.2971	42.6753	51.6013	43.5845	47.7793	44.2484	44.5626	32.7656	32.888	39.1392	33.6028	0.358885	0.281503	0.162699
ENSMUSG00000020184	Mdm2	12.1547	18.3841	18.3698	13.6354	27.8004	31.7237	38.1596	38.2663	25.8877	32.5524	35.8296	28.2437	23.067	27.1313	25.3246	28.9405	0.00171865	0.00208161	0.00256002
ENSMUSG00000033577	Myo6	1.83209	2.95127	3.4029	3.76909	4.25444	2.65385	4.55608	3.68003	4.67592	5.29615	4.5938	6.19391	3.32054	6.54124	3.16135	5.84415	0.227663	0.00793902	0.140958
ENSMUSG00000028224	Nbn	13.3179	19.0544	21.3997	17.8614	17.6454	20.0082	20.0307	20.6334	20.5675	21.5349	19.9235	20.789	16.6558	16.8531	19.4646	17.1591	0.412232	0.198028	0.846928
ENSMUSG00000031644	Nek1	6.86819	13.0862	16.1302	11.6174	11.4177	12.0904	14.5147	15.1016	16.9223	18.9447	19.0863	21.2165	8.70765	16.2467	10.0919	15.2895	0.557119	0.0264504	0.81462
ENSMUSG00000022141	Nipbl	7.95625	14.0056	14.8613	10.5778	14.1095	17.3058	16.261	23.0349	17.6952	24.0483	19.0599	20.8612	18.4883	16.8477	9.95182	14.6731	0.0587224	0.00687499	0.247213
ENSMUSG00000040771	Oard1	27.3292	35.6805	38.9962	38.5619	39.335	41.3375	38.9162	44.5563	41.6917	41.9924	40.5031	42.2338	33.6815	42.7232	43.2427	45.6374	0.11577	0.0956211	0.152337
ENSMUSG00000035365	Parpbp	5.25197	7.35683	9.01211	7.40232	4.63978	5.921	5.57025	9.62911	9.76476	10.6383	10.4138	10.5939	8.85099	12.6759	10.7533	12.7719	0.567634	0.0239233	0.0168167
ENSMUSG00000029202	Pds5a	26.1131	48.6503	56.2065	41.6395	49.1807	48.4577	54.5457	59.815	55.2643	65.8963	61.2041	59.5596	46.6781	56.8122	34.4439	57.7627	0.228812	0.0678975	0.518701
ENSMUSG00000041801	Phlda3	36.1345	27.5117	30.6826	31.5596	38.9682	45.7356	37.2314	48.4061	34.7555	40.6923	36.1805	32.0462	44.9707	28.0203	42.7656	32.9556	0.0167448	0.130267	0.261777
ENSMUSG00000041064	Pif1	5.74796	9.63548	10.7665	8.00395	2.08889	4.37618	2.95408	12.7201	11.2095	14.4674	14.5115	13.118	9.08753	12.5198	11.2549	12.1256	0.321927	0.0138362	0.0936512
ENSMUSG00000030867	Plk1	46.0561	67.2022	69.4364	58.925	17.6874	30.8019	18.8911	69.8696	74.2887	96.4558	93.693	77.9054	117.299	92.3664	106.768	100.375	0.120048	0.0168371	0.00108453
ENSMUSG00000024521	Pmaip1	1.9968	1.43619	1.21588	1.83517	2.57979	2.53247	2.38026	2.07136	1.3324	1.80761	2.45954	1.08384	2.03916	2.07863	2.089	2.22894	0.0147022	0.893021	0.0690342
ENSMUSG00000021668	Polk	3.75147	7.10504	8.56107	5.13837	8.75262	8.64692	10.8206	10.834	10.3383	12.58	10.5381	12.085	8.49217	11.7693	9.27175	11.3847	0.0331771	0.00894301	0.0237898
ENSMUSG00000020525	Ppm1d	7.31496	9.63923	10.7665	10.4817	12.8491	10.7772	13.4227	14.0147	13.1433	14.5443	12.9563	13.6793	9.71267	14.4324	12.8013	13.0257	0.0227206	0.008395	0.0614137
ENSMUSG00000051977	Prdm9	1.42344	4.0192	5.23695	2.90188	3.81931	2.50475	4.58812	4.23948	3.6092	5.1371	4.76326	5.83374	2.71982	6.63707	3.78717	6.00205	0.691844	0.187042	0.301007
ENSMUSG00000040850	Psme4	28.7986	40.755	46.5064	40.6729	43.1791	41.9942	44.4489	48.4048	48.9753	59.0571	52.9823	58.6166	46.8203	57.007	42.2177	52.5227	0.254357	0.0157002	0.0790645
ENSMUSG00000043733	Ptpn11	24.7929	39.1	42.307	36.7829	39.7682	45.7576	42.4494	57.094	45.0263	54.1672	47.5026	44.8711	52.0343	46.277	36.4136	48.1859	0.0991637	0.0419476	0.0973125
ENSMUSG00000032217	Rnf111	6.28735	10.5408	11.5168	9.67971	11.2765	10.5292	11.9866	14.8816	13.4284	16.3946	14.0659	15.4348	13.2909	14.7086	11.477	13.9316	0.124217	0.0105682	0.0345188
ENSMUSG00000058761	Rnf169	1.80698	2.9108	3.41595	2.5817	4.2416	4.90335	4.52253	5.1982	3.95944	4.9207	4.54386	3.86939	3.87791	3.77308	2.74277	3.3562	0.00364385	0.00919195	0.127592
ENSMUSG00000022292	Rrm2b	4.1232	6.4835	6.91561	4.81914	7.99549	6.66127	8.50182	8.36047	8.6836	7.92289	9.69986	10.008	6.70641	8.358	5.87076	8.44025	0.0325652	0.00656892	0.103957
ENSMUSG00000028893	Sesn2	8.4914	16.9426	23.9658	16.8271	15.4698	18.4263	19.9036	25.4542	20.8264	28.5424	24.3487	30.2437	22.3679	23.7187	22.0589	27.6198	0.428489	0.0538323	0.0972856
ENSMUSG00000037111	Setd7	12.4395	13.982	14.9312	11.5749	14.6634	13.318	15.427	17.0276	16.7151	21.3828	18.751	20.5306	14.5451	19.7512	13.1632	17.8079	0.133084	0.00390111	0.133618
ENSMUSG00000043535	Setx	6.64734	10.0184	12.4067	10.6714	12.8016	11.5194	12.6331	14.7481	13.3786	15.6894	14.3976	15.6472	9.64685	15.6591	8.93403	13.1146	0.0861658	0.0199535	0.375456
ENSMUSG00000039738	Slx4	3.02617	12.5052	13.617	9.69115	12.1126	10.7214	16.3951	17.2479	15.2769	16.8672	14.1669	14.8889	7.69317	13.8383	10.5656	14.9302	0.181299	0.0970835	0.508244
ENSMUSG00000030655	Smg1	4.82114	11.8015	13.9317	10.3235	12.7252	11.6424	14.3475	16.1825	13.6709	18.1405	16.5854	16.5402	10.5971	17.7115	7.97531	12.7619	0.176383	0.045473	0.498706
ENSMUSG00000031986	Sprtn	7.89423	13.4755	14.3589	10.8632	13.7311	13.4899	14.5725	16.5005	14.1837	17.5458	15.905	16.7511	14.643	19.9796	10.9821	20.2025	0.13841	0.0469124	0.129265
ENSMUSG00000045098	Suv420h1	3.57572	9.57129	10.6894	6.92343	5.62838	5.17924	8.6812	10.7187	9.70517	11.8895	9.0389	10.8131	5.6568	8.64437	4.80967	7.50385	0.948688	0.193045	0.592626
ENSMUSG00000017291	Taok1	7.35342	13.2641	14.3384	12.1078	14.6528	13.475	14.7878	16.931	14.6978	17.8057	16.3925	17.3887	11.8025	17.9937	9.9307	14.7868	0.129015	0.0444243	0.457411
ENSMUSG00000059981	Taok2	8.66602	13.577	16.0685	13.0656	14.5018	14.6015	14.4392	19.2706	17.5637	18.7757	17.8516	17.3059	13.7841	16.1725	13.9525	14.7602	0.195146	0.0439721	0.330832
ENSMUSG00000061288	Taok3	7.83418	11.6175	11.9772	11.5011	11.8554	11.0551	12.3328	13.4704	12.5647	14.0946	15.9909	13.3246	14.8421	14.5663	13.329	14.0409	0.249621	0.0393472	0.0316258
ENSMUSG00000021177	Tdp1	16.7619	24.037	24.5149	18.2861	22.2167	27.6581	23.387	28.5184	25.9133	28.3425	26.9381	22.5406	22.5368	19.7076	21.9636	23.5179	0.123397	0.0828404	0.654393
ENSMUSG00000005718	Tfap4	10.2173	19.0153	18.4291	13.0175	15.3764	19.3556	19.9535	22.6506	21.2264	23.0877	21.0565	20.4852	17.1813	17.2242	17.49	17.382	0.167012	0.0556565	0.387779
ENSMUSG00000026219	Trip12	25.4333	36.5422	46.0229	38.4805	53.041	44.2175	49.0367	68.648	59.5651	67.8157	59.2698	66.8331	75.9405	65.5085	48.0624	67.2681	0.0469352	0.00339935	0.0104317
ENSMUSG00000021569	Trip13	25.7678	35.8178	35.1103	34.2261	37.427	35.6687	36.849	40.888	42.8881	39.1775	41.5746	42.0935	33.2631	41.3124	41.2901	45.424	0.122812	0.0280443	0.070993
ENSMUSG00000035898	Uba6	10.066	17.3029	19.7473	18.0945	19.5437	17.6538	20.5637	22.4822	24.6548	24.2344	25.0843	26.4266	18.5741	28.8819	15.3392	26.7767	0.182879	0.0232728	0.175003
ENSMUSG00000078578	Ube2d3	182.971	271.695	259.004	258.823	226.1	283.203	269.804	313.507	234.405	278.87	316.801	269.479	304.413	206.438	244.588	364.153	0.312601	0.27584	0.402212
ENSMUSG00000025878	Uimc1	25.7405	41.975	44.1838	38.7315	38.4897	28.4241	46.5686	40.5836	37.4813	34.7595	36.0423	39.5774	23.95	32.435	34.3756	30.4219	0.883039	0.879955	0.182862
ENSMUSG00000029591	Ung	10.7563	18.8239	21.2567	17.1367	20.0926	14.8038	18.3663	14.1846	8.58423	9.35932	10.9227	9.11881	13.4432	15.6029	20.0756	17.5486	0.96237	0.0411147	0.906942
ENSMUSG00000045210	Vcpip1	4.35028	7.41884	8.82249	7.42311	7.613	7.14826	8.72865	10.0846	9.26947	11.2297	9.97073	10.8869	12.3889	12.3584	8.30281	12.1838	0.277025	0.0301243	0.0205448
ENSMUSG00000024283	Wac	28.1428	54.8429	59.9856	44.7571	57.8375	51.0014	52.0682	61.6162	52.8775	69.0169	61.79	62.2992	61.6191	69.8246	51.0429	75.5346	0.311688	0.129139	0.0964273
ENSMUSG00000040433	Zbtb38	4.45693	7.50772	8.06381	6.68394	8.54246	7.04874	7.75548	11.3304	10.4101	12.1239	10.8576	10.1764	8.89874	11.6278	7.14808	10.1881	0.157463	0.00661952	0.0669587
ENSMUSG00000000552	Zfp385a	6.72348	11.2669	11.2126	10.701	17.9187	15.0942	18.1522	16.7401	13.6207	14.0175	19.5316	14.8864	18.8391	13.2913	18.1525	18.0987	0.00275762	0.0206397	0.00578707
ENSMUSG00000066440	Zfyve26	1.80398	2.9694	3.63425	2.5286	3.27053	3.48989	4.55531	4.86339	4.24381	4.84174	3.86621	4.66071	2.98051	4.23342	2.5342	3.31224	0.0540876	0.0142175	0.352362
ENSMUSG00000027663	Zmat3	1.96451	2.79027	3.34206	2.96611	4.27237	4.01125	4.78532	4.95632	4.12294	4.94853	4.5835	4.35783	3.69724	4.14273	4.50304	4.45741	0.00373256	0.00387367	0.00848888

## Sheet: MC38 Cellular response to inter
Gene ID	Gene name	Con-03h-1	Con-03h-2	Con-03h-3	Con-03h-4	RT-03h-1	RT-03h-2	RT-03h-3	RT-03h-4	RT-12h-1	RT-12h-2	RT-12h-3	RT-12h-4	RT-24h-1	RT-24h-2	RT-24h-3	RT-24h-4	RT-03h_vs_Con_pval	RT-12h_vs_Con_pval	RT-24h_vs_Con_pval
ENSMUSG00000035385	Ccl2	322.849	387.553	408.31	372.947	692.778	400.748	654.478	467.671	649.399	458.211	568.414	794.267	853.239	678.327	1070.81	903.83	0.0799704	0.0366295	0.00671816
ENSMUSG00000000982	Ccl3	6.71084	11.3785	6.9292	11.9064	10.114	4.56302	9.64112	5.81188	10.3424	8.07758	9.85825	7.76037	17.7098	18.0526	26.7567	23.9569	0.420408	0.892005	0.00523014
ENSMUSG00000018930	Ccl4	18.8647	30.1642	24.4884	29.0029	25.2347	18.8659	28.4821	22.8935	27.438	15.6896	26.8105	24.938	100.842	61.7115	98.5387	73.275	0.610371	0.628196	0.00687182
ENSMUSG00000035042	Ccl5	101.874	116.79	144.702	116.542	188.882	151.254	181	329.987	174.352	218.03	180.261	177.384	540.894	215.682	464.492	282.72	0.0998879	0.00267491	0.0425564
ENSMUSG00000035373	Ccl7	70.2346	88.3578	98.1872	111.293	116.372	58.5718	99.1662	74.2027	85.7974	62.6825	88.1224	83.5781	185.95	139.471	223.069	153.896	0.762121	0.301087	0.0133849
ENSMUSG00000031778	Cx3cl1	6.09506	9.08982	12.2031	9.81761	18.6561	9.24514	13.3296	10.0402	24.139	19.9328	20.8967	25.6862	24.3571	22.9254	18.5313	24.3259	0.217155	0.00036119	0.00040683
ENSMUSG00000026193	Fn1	86.1189	166.848	172.488	97.4356	130.889	143.51	208.954	203.671	293.403	498.602	435.312	512.76	559.085	434.351	235.635	330.946	0.225061	0.00459348	0.0279449
ENSMUSG00000025746	Il6	0.932109	1.66361	1.52649	1.25156	2.51535	3.01536	2.68343	2.74341	3.03921	2.7717	2.09744	2.60319	8.82313	4.0305	7.26443	4.75442	0.000700427	0.00269508	0.0206984
ENSMUSG00000022126	Irg1	7.91307	13.0424	10.3403	11.4074	12.8735	8.15503	19.054	8.26029	11.0178	8.90167	10.1906	13.0763	19.2732	16.2136	24.4443	21.9829	0.639307	0.933555	0.00533165
ENSMUSG00000040026	Saa3	6.76425	23.5064	9.76926	12.4315	12.2814	7.9621	43.9322	7.97978	25.6467	11.5412	28.3189	20.4297	17.951	37.0234	46.837	32.8817	0.629044	0.158505	0.0331667

## Sheet: MC38 Neutrophil chemotaxis
Gene ID	Gene name	Con-03h-1	Con-03h-2	Con-03h-3	Con-03h-4	RT-03h-1	RT-03h-2	RT-03h-3	RT-03h-4	RT-12h-1	RT-12h-2	RT-12h-3	RT-12h-4	RT-24h-1	RT-24h-2	RT-24h-3	RT-24h-4	RT-03h_vs_Con_pval	RT-12h_vs_Con_pval	RT-24h_vs_Con_pval
ENSMUSG00000035385	Ccl2	322.849	387.553	408.31	372.947	692.778	400.748	654.478	467.671	649.399	458.211	568.414	794.267	853.239	678.327	1070.81	903.83	0.0799704	0.0366295	0.00671816
ENSMUSG00000004814	Ccl24	0.3246	0	0	0	0.080801	0.11843	0.184988	0	0	0	0.131045	0	0.269222	0	0	0	0.875784	0.610091	0.899961
ENSMUSG00000023235	Ccl25	7.57785	10.38	14.46	9.77612	11.4966	8.02904	14.0164	15.2328	13.6181	14.7878	15.8201	15.5953	9.36148	11.0522	13.2446	14.1328	0.472178	0.0483409	0.467676
ENSMUSG00000000982	Ccl3	6.71084	11.3785	6.9292	11.9064	10.114	4.56302	9.64112	5.81188	10.3424	8.07758	9.85825	7.76037	17.7098	18.0526	26.7567	23.9569	0.420408	0.892005	0.00523014
ENSMUSG00000018930	Ccl4	18.8647	30.1642	24.4884	29.0029	25.2347	18.8659	28.4821	22.8935	27.438	15.6896	26.8105	24.938	100.842	61.7115	98.5387	73.275	0.610371	0.628196	0.00687182
ENSMUSG00000018927	Ccl6	53.7408	30.5125	23.8135	72.4718	36.1115	44.4616	87.049	40.1436	13.1122	26.8734	46.9837	8.2109	122.68	21.6622	77.4536	38.5489	0.689904	0.184482	0.467158
ENSMUSG00000035373	Ccl7	70.2346	88.3578	98.1872	111.293	116.372	58.5718	99.1662	74.2027	85.7974	62.6825	88.1224	83.5781	185.95	139.471	223.069	153.896	0.762121	0.301087	0.0133849
ENSMUSG00000019122	Ccl9	17.4779	13.3525	11.8796	26.4499	16.6249	15.4618	27.0073	13.1821	6.93029	9.18141	14.9955	4.78794	35.35	12.6347	27.8093	17.0204	0.867833	0.086199	0.376588
ENSMUSG00000058427	Cxcl2	1.02339	2.71878	2.59874	1.73705	1.20432	1.34263	3.81946	3.23901	2.60546	2.21266	2.55252	2.35577	4.43862	4.80328	6.51488	10.6124	0.642429	0.380213	0.0433688
ENSMUSG00000029379	Cxcl3	1.58095	2.53517	2.56661	2.00767	1.94341	3.23188	4.48926	3.90602	2.77832	3.02241	0.88657	1.89009	5.01255	4.02843	4.89891	7.98059	0.108623	0.960508	0.0270276
ENSMUSG00000029373	Pf4	24.8022	32.3706	18.3663	48.4768	29.3678	16.3131	69.9192	12.6139	13.9624	16.5525	23.3484	7.9556	24.8369	9.47088	24.8414	14.6152	0.946004	0.0921255	0.15812
ENSMUSG00000029372	Ppbp	0.49551	1.08873	0.262799	0.528858	0.29181	0.278169	2.15895	0.31823	0.359238	0.423919	0.322142	0.540625	0.670313	0.449362	0.52156	1.01712	0.753613	0.380293	0.755833
ENSMUSG00000042265	Trem1	1.04722	2.29962	1.02747	1.5671	1.17382	0.767258	0.808245	0.780088	0.696896	0.869043	1.46146	0.567991	1.40613	1.24267	1.42274	1.34455	0.134673	0.160155	0.691649

## Sheet: RM9 Cellular response to DNA da
Gene ID	Gene name	Con-03h-1	Con-03h-2	Con-03h-3	Con-03h-4	RT-03h-1	RT-03h-2	RT-03h-3	RT-03h-4	RT-12h-1	RT-12h-2	RT-12h-3	RT-12h-4	RT-24h-1	RT-24h-2	RT-24h-3	RT-03h_vs_Con_pval	RT-12h_vs_Con_pval	RT-24h_vs_Con_pval
ENSMUSG00000026831	1700007K13Rik	0.157541	0.338551	0	0.63666	0.680232	2.07473	0.979517	3.04008	0.746467	0.635798	0.670482	0.434417	1.00537	0.759286	1.01125	0.0757158	0.0844184	0.0116692
ENSMUSG00000020284	1810043G02Rik	4.94183	5.5296	5.2219	5.74469	4.63576	4.74413	3.5714	5.03186	3.74689	3.53916	4.45192	4.0792	4.50843	5.14057	5.4414	0.0676242	0.00195612	0.376204
ENSMUSG00000035401	2210018M11Rik	4.76549	4.67176	5.77231	5.92171	8.20721	7.1184	5.94007	8.18672	3.56534	6.53845	5.67941	4.96877	4.73793	5.41182	5.96924	0.0217262	0.899379	0.860063
ENSMUSG00000073684	2610002J02Rik	15.9943	13.6949	11.3438	14.3043	8.92231	10.6463	10.7502	9.79545	9.86956	9.05191	12.2069	10.0767	11.8811	13.2906	12.857	0.0211971	0.0272318	0.33108
ENSMUSG00000005871	Apc	4.33627	3.41817	6.24616	4.5945	8.1148	6.65978	7.10302	9.09734	3.17787	6.42003	3.84194	3.66288	3.8551	4.18002	5.75292	0.0084818	0.704836	0.951932
ENSMUSG00000034218	Atm	1.2312	0.880949	1.80249	1.69475	2.53625	1.95094	1.8194	3.007	0.642508	1.51188	1.33694	1.00757	1.32252	1.22711	1.71771	0.0396239	0.371038	0.941659
ENSMUSG00000034266	Batf	1.86098	1.63286	0.999623	1.75021	1.03337	0.848118	0.823387	1.19915	0.892439	0.833647	0.884796	0.61258	1.715	0.840375	1.22039	0.0482181	0.0238991	0.394974
ENSMUSG00000030983	Bccip	34.1038	39.4853	32.3537	39.5537	28.6543	31.2958	27.6163	30.4019	25.2582	26.0138	27.0841	28.0133	30.9014	35.8631	33.9186	0.025825	0.00946016	0.284519
ENSMUSG00000089929	Bcl2a1b	25.6322	27.8603	22.0225	23.3914	10.5466	17.9427	17.0228	19.7731	19.2263	7.13911	16.9824	18.0428	34.4334	24.0398	26.0077	0.0162439	0.0347201	0.399847
ENSMUSG00000027381	Bcl2l11	4.80682	4.75731	5.40468	3.72506	7.89834	6.90853	6.28788	7.97211	3.53696	4.73881	4.5543	5.46604	4.75018	5.03608	6.03241	0.00306101	0.85718	0.307698
ENSMUSG00000061755	Bod1l	2.59667	2.30691	3.43789	2.88443	4.90323	4.06279	3.68896	5.47917	1.81843	3.17915	2.57099	2.53641	2.26208	2.90964	3.11623	0.0150807	0.476122	0.906291
ENSMUSG00000031628	Casp3	48.2781	55.2801	57.4546	51.9948	66.0931	61.4148	53.8702	70.0225	28.433	59.6512	47.6929	41.0633	49.8651	48.4064	64.0451	0.0641652	0.263304	0.885114
ENSMUSG00000020326	Ccng1	66.6427	62.5918	52.5854	79.7626	119.556	167.898	112.675	182.809	69.2057	90.2237	106.502	82.5487	110.897	75.2456	106.018	0.0147217	0.0687015	0.0827914
ENSMUSG00000033102	Cdc14b	2.30722	2.24559	3.25787	3.17633	4.12738	4.48613	3.0394	3.62005	1.94881	4.40241	3.25542	2.77358	2.18122	2.56025	3.0255	0.0428211	0.576938	0.684346
ENSMUSG00000023067	Cdkn1a	115.565	83.5565	92.6941	98.7563	180.905	224.689	157.344	197.627	128.808	140.853	170.64	122.32	175.17	168.185	173.864	0.00331453	0.018932	0.000792108
ENSMUSG00000037628	Cdkn3	8.72776	8.87405	8.13412	10.7566	3.65844	4.84757	4.46421	6.2832	8.00576	9.59986	10.5456	8.7981	6.18444	8.23878	6.52688	0.00158109	0.88927	0.0586601
ENSMUSG00000028089	Chd1l	4.34093	4.03742	3.8795	5.40984	3.48412	3.67245	3.37737	4.76203	2.49809	3.16993	2.96253	2.99476	3.67596	3.45143	4.18156	0.253533	0.0154289	0.175647
ENSMUSG00000078671	Chd2	3.12252	3.57431	5.5308	3.58188	7.65844	5.52529	4.77593	6.4705	2.97145	5.02098	2.91782	4.00677	3.44251	3.76335	3.90659	0.0402925	0.771011	0.681401
ENSMUSG00000029238	Clock	3.39346	4.02331	5.39473	5.80276	9.42821	5.46768	7.38754	8.26677	4.31537	6.49152	4.98365	4.40001	4.4175	4.07503	4.29102	0.0296366	0.622124	0.541687
ENSMUSG00000026011	Ctla4	1.03043	1.08083	1.01826	2.18987	0.62669	1.03261	0.22123	0.811238	0.667297	0.553924	0.660707	0.395254	0.671126	0.965306	0.673863	0.107881	0.0739245	0.145151
ENSMUSG00000103326	Ctla4	0	0	0	0	0	0	0	0	0	0	0	0	0	0	0	NA	NA	NA
ENSMUSG00000024740	Ddb1	182.481	156.471	172.537	173.812	202.243	184.415	180.129	199.349	102.497	157.857	149.657	134.334	141.379	172.474	184.017	0.0391355	0.055758	0.72627
ENSMUSG00000028630	Dyrk2	7.81308	7.22802	9.65184	9.47991	14.8955	9.83503	11.7425	12.0023	5.14039	9.24297	8.59795	6.44285	9.75841	6.5192	13.182	0.0329244	0.339286	0.581718
ENSMUSG00000062762	Ei24	41.7142	38.7588	34.237	51.7862	55.0602	73.8817	53.6625	79.3804	38.0807	44.7013	51.3621	43.5694	45.1449	45.3847	51.4919	0.0263992	0.567386	0.243324
ENSMUSG00000003549	Ercc1	36.8659	33.4826	28.5865	38.5193	25.7625	27.5806	23.7216	27.3004	23.7598	21.6511	28.3729	25.6933	36.1902	32.4519	32.7723	0.025412	0.0142951	0.832851
ENSMUSG00000026048	Ercc5	8.4037	9.44677	8.64281	11.7534	15.0235	18.6515	13.0098	22.0343	9.06325	11.1125	10.7811	10.5276	9.8328	12.1511	12.7322	0.0248921	0.404682	0.153573
ENSMUSG00000033458	Fan1	0.670159	0.423797	0.791472	0.678722	1.11067	0.908424	0.855267	1.24485	0.446181	0.758496	0.621624	0.583094	0.638082	0.50493	0.74861	0.0177021	0.714431	0.924108
ENSMUSG00000021461	Fancc	2.56338	2.27155	2.25892	2.58486	1.31808	2.46883	1.04536	2.02043	0.964814	1.97192	2.16728	1.15314	2.84589	2.36186	2.33347	0.115111	0.0583796	0.651011
ENSMUSG00000052934	Fbxo31	7.70356	7.6548	6.65998	8.11819	6.87114	6.37461	6.07631	5.90686	4.55418	5.65784	5.1843	5.73098	6.39368	7.42691	6.54955	0.0202855	0.00163871	0.159767
ENSMUSG00000055401	Fbxo6	21.5031	18.8003	16.3568	19.5442	13.261	16.9825	13.2785	16.2164	13.1626	13.6586	17.3424	14.7285	21.4358	18.3201	21.6285	0.0292647	0.0227134	0.395059
ENSMUSG00000061175	Fnip2	2.88614	2.3859	4.28008	3.14619	6.31673	4.14502	4.94279	4.50369	2.43869	3.56632	2.47928	3.03006	2.48495	3.03301	3.35666	0.028283	0.564234	0.668657
ENSMUSG00000048756	Foxo3	5.74511	4.47002	5.67846	5.41544	7.65561	8.42989	6.26767	8.8582	3.35598	5.15087	5.56032	4.54411	5.97307	6.13995	6.7751	0.0144797	0.284973	0.0524227
ENSMUSG00000048000	Gigyf2	13.2197	14.8137	19.5833	13.1102	26.2979	20.3587	18.9095	21.2753	10.6268	19.8096	14.2096	13.1409	10.5357	15.9594	14.6661	0.0255264	0.77596	0.543623
ENSMUSG00000021639	Gtf2h2	14.7536	15.7159	16.5327	19.3618	13.27	14.0343	12.9852	15.3415	10.1675	12.4751	11.9955	12.3982	12.0361	15.7266	14.6076	0.067391	0.00934455	0.160754
ENSMUSG00000049932	H2afx	60.4517	65.9608	52.8757	73.4614	44.4348	40.5672	37.4268	43.9096	40.6668	39.308	44.119	42.0948	39.9757	62.7592	51.7899	0.0107399	0.013115	0.219045
ENSMUSG00000020228	Helb	2.22858	2.31856	2.50056	2.86658	3.73694	3.38821	2.76011	4.02747	1.38754	2.81612	1.9897	1.94872	2.17049	2.24789	2.47915	0.0262973	0.241298	0.338602
ENSMUSG00000030451	Herc2	2.68951	2.43758	3.4791	3.01201	4.28115	3.89508	3.34994	4.94399	1.84025	3.14247	2.52397	2.36151	2.32793	2.65689	3.05386	0.0281729	0.259117	0.497734
ENSMUSG00000032119	Hinfp	2.92905	2.55039	3.41263	2.83453	4.12635	4.18671	3.53797	5.0057	2.39566	3.66519	2.76203	2.74966	2.8798	3.24018	3.29413	0.0152976	0.910106	0.394877
ENSMUSG00000061436	Hipk2	3.26955	2.48734	3.10988	3.65057	7.86407	5.07858	5.60158	6.49161	1.84866	6.81913	2.77579	2.08655	3.76093	3.0444	4.07722	0.00924622	0.843771	0.267402
ENSMUSG00000005413	Hmox1	19.8917	14.7442	17.2736	15.551	23.7833	21.3337	23.1073	20.3982	16.3511	16.4587	18.6523	14.8332	21.2038	25.7092	26.6	0.0108947	0.841027	0.021854
ENSMUSG00000025261	Huwe1	14.6744	12.5134	20.9133	18.1511	25.5707	20.0457	20.503	25.9342	10.2763	17.942	13.0372	12.8659	12.1555	16.1513	17.4797	0.0393968	0.263332	0.618473
ENSMUSG00000021690	Jmy	3.99808	3.43531	5.37129	3.98787	7.24082	5.22781	5.89041	6.13163	2.81551	4.37453	3.80016	3.75226	3.4253	4.31133	4.84069	0.0169639	0.36767	0.992605
ENSMUSG00000030677	Kif22	26.6916	25.2816	22.0452	29.5228	18.4167	19.0452	15.3455	22.7274	21.2685	24.257	21.7464	23.7297	15.2133	24.4908	21.2205	0.0180199	0.137599	0.164677
ENSMUSG00000060657	Marf1	4.17467	4.35966	5.23532	5.0217	6.73181	6.74615	5.33568	7.2911	3.46107	4.76333	4.93102	4.53987	4.61785	4.78399	5.14441	0.0136601	0.53775	0.636467
ENSMUSG00000037570	Mcrs1	32.6031	29.1618	26.8211	35.4039	25.2677	26.1004	24.8325	26.2155	20.551	19.979	20.9962	21.869	22.0054	26.0861	27.2277	0.0626522	0.0107856	0.0624886
ENSMUSG00000020184	Mdm2	512.299	461.775	880.108	721.054	1605.68	1585.98	1183.73	1692.14	863.74	1149.96	1016.74	995.152	706.248	1017.85	979.697	0.00119351	0.0242223	0.123405
ENSMUSG00000033577	Myo6	1.0829	0.785497	0.904356	0.811911	1.34312	1.02492	1.29462	1.74906	0.650579	0.833669	0.83422	0.971229	0.722777	0.887086	0.911067	0.0472243	0.462989	0.560426
ENSMUSG00000028224	Nbn	5.59811	4.68318	4.30895	5.79918	3.89506	3.68534	2.99429	4.7529	2.73422	3.28762	3.5756	3.01777	4.5522	4.13994	4.9886	0.0474857	0.00641428	0.271904
ENSMUSG00000031644	Nek1	1.90341	2.03072	2.13863	1.70775	3.22006	2.40254	2.44556	3.24494	1.10871	2.2919	2.19794	1.69044	1.37492	1.71215	1.69613	0.0253974	0.692747	0.0656417
ENSMUSG00000022141	Nipbl	5.51402	4.27387	6.17378	5.36031	9.57516	7.02457	6.75145	10.0246	3.01208	6.89261	5.05576	4.27622	4.99582	5.06263	6.43372	0.0295728	0.592229	0.797539
ENSMUSG00000040771	Oard1	12.1942	10.5167	8.73856	12.427	8.08098	9.21321	8.38475	10.05	6.78498	8.48103	9.36857	7.91388	10.0304	9.22925	10.3789	0.0945888	0.0376766	0.304565
ENSMUSG00000035365	Parpbp	4.10516	4.15552	4.33789	4.77734	3.58439	3.2659	2.83891	4.61658	3.74425	5.79002	5.39442	4.71777	3.08358	3.62586	3.36462	0.134342	0.301489	0.00719303
ENSMUSG00000029202	Pds5a	22.3669	21.512	24.3297	26.7795	35.1373	27.434	27.7418	35.4507	16.6594	28.5146	21.1502	18.743	19.5511	20.8217	28.1242	0.0319123	0.429322	0.775894
ENSMUSG00000041801	Phlda3	89.2369	94.1408	82.0984	92.8428	104.037	132.429	113.712	115.595	90.9441	84.1643	104.919	96.1345	89.9098	112.554	100.408	0.0129617	0.425433	0.216675
ENSMUSG00000041064	Pif1	2.65528	2.78959	3.49886	4.80454	2.37444	2.7752	1.96167	2.9441	3.62753	3.86025	4.16515	4.14432	2.78557	3.31649	3.17902	0.159143	0.379743	0.546702
ENSMUSG00000030867	Plk1	40.7301	33.4954	30.1626	43.993	21.2533	23.1396	19.4801	29.2341	28.2534	35.8261	37.8343	30.5528	23.5925	34.0492	32.7658	0.0142631	0.350282	0.192469
ENSMUSG00000024521	Pmaip1	26.5335	36.802	33.6361	23.769	37.6357	55.4766	41.9475	45.8727	22.0446	28.1994	27.5862	26.256	38.2747	32.019	42.2569	0.0227107	0.276565	0.147133
ENSMUSG00000021668	Polk	4.7467	4.58077	5.76549	6.06341	9.16149	9.72114	7.56191	11.9672	5.51894	8.3018	6.64169	6.7741	6.54721	6.73607	8.20583	0.0121045	0.0743225	0.0452653
ENSMUSG00000020525	Ppm1d	6.13523	6.29761	5.51834	7.15991	7.96883	9.17039	7.87809	9.34937	4.95116	5.89623	6.59659	6.15451	6.90151	6.21146	8.22624	0.00432015	0.465472	0.300584
ENSMUSG00000051977	Prdm9	0.208354	0.370267	0.495108	0.509075	0.809444	0.754384	0.50612	1.03064	0.503701	1.41322	0.428619	0.499301	0.434918	0.389681	0.520439	0.0306047	0.275483	0.541126
ENSMUSG00000040850	Psme4	16.3709	16.3642	18.5068	17.3538	23.3335	21.8638	20.5835	22.2484	11.2496	19.8965	15.4858	15.1278	15.2719	17.1085	18.4352	0.00073377	0.412592	0.853026
ENSMUSG00000043733	Ptpn11	21.0507	20.9401	25.5115	24.1477	31.9547	27.5299	26.6591	32.0756	15.7853	25.8655	22.6224	19.8526	20.5729	22.1487	25.1345	0.0119638	0.475675	0.874689
ENSMUSG00000032217	Rnf111	5.4062	5.68449	7.51369	6.59957	9.22707	7.52508	7.94404	8.60907	5.20054	7.00666	6.06295	5.82182	5.59141	5.76209	6.82377	0.0170395	0.664147	0.709844
ENSMUSG00000058761	Rnf169	4.09365	4.13215	5.1558	5.53819	6.73222	8.44681	5.95374	8.79138	4.42335	4.60891	4.47357	5.20669	4.51041	5.16629	5.21442	0.0185655	0.904314	0.611155
ENSMUSG00000022292	Rrm2b	1.70858	1.85751	2.06532	2.41264	3.34658	3.08025	2.21675	3.363	1.28752	2.91573	1.90812	1.52463	2.41804	1.47635	2.23351	0.0258879	0.806504	0.92864
ENSMUSG00000028893	Sesn2	7.22841	5.75179	11.205	8.28945	13.6749	18.2876	13.0997	16.8731	9.73777	9.61531	9.55656	8.72972	9.64166	8.82363	11.1422	0.00499579	0.346934	0.252172
ENSMUSG00000037111	Setd7	12.1341	9.73214	12.5089	12.2275	17.2938	13.8724	13.4947	17.2042	6.75877	13.7392	11.7001	9.21068	12.3725	11.5552	14.2816	0.0255923	0.473638	0.349835
ENSMUSG00000043535	Setx	6.20544	5.83181	6.96452	5.85458	9.16783	8.34481	7.62704	9.67467	3.31988	6.34657	5.10617	4.80428	5.61197	6.16975	7.6395	0.00551011	0.12163	0.722305
ENSMUSG00000039738	Slx4	3.86714	4.58658	5.53214	5.34956	8.13139	8.68893	6.35727	8.83504	4.91311	7.08889	6.36021	5.02293	4.38341	5.53444	7.67601	0.00506772	0.17647	0.402822
ENSMUSG00000030655	Smg1	3.86878	3.66744	5.98944	5.36847	8.37255	6.28883	6.08132	7.96742	3.10671	5.86636	4.60039	3.81724	3.96248	4.39009	5.2316	0.0233223	0.662601	0.785426
ENSMUSG00000031986	Sprtn	2.35816	2.32831	4.01028	3.45192	6.02775	4.38106	4.66525	5.04727	2.42016	3.96535	3.86455	3.05967	3.5854	3.05316	4.17316	0.0114762	0.618947	0.331772
ENSMUSG00000045098	Suv420h1	5.49463	5.26036	7.24992	4.93217	10.1807	7.84741	6.93147	8.76741	3.55128	5.35266	3.95378	4.98157	4.98028	6.10233	6.01479	0.0228735	0.107439	0.957807
ENSMUSG00000017291	Taok1	4.90418	4.72723	6.43288	5.26611	8.45668	7.27016	7.01645	8.73364	3.72213	6.22742	4.74333	4.43532	5.01307	4.86277	5.85462	0.00456549	0.433665	0.863463
ENSMUSG00000059981	Taok2	7.10083	6.54619	8.45997	8.74677	9.72928	10.4898	9.20575	11.2788	6.38113	8.73323	7.60285	7.34743	6.9266	8.29978	8.83128	0.012772	0.792498	0.710979
ENSMUSG00000061288	Taok3	9.03369	8.78078	11.4007	9.05287	16.6189	12.8542	12.8952	14.7337	7.20117	11.8542	11.0968	9.24992	8.94539	9.69507	10.6717	0.00649957	0.823826	0.807268
ENSMUSG00000021177	Tdp1	14.3986	14.4547	13.2543	16.2984	13.087	10.6138	11.9044	12.3359	9.69424	9.7563	13.2085	10.4758	9.83785	12.4784	13.2324	0.0193662	0.0117851	0.0951877
ENSMUSG00000005718	Tfap4	13.4116	10.9066	14.8612	15.4993	11.0876	10.7412	9.63214	12.3164	8.07908	7.65399	8.31846	8.97929	8.2079	13.0245	11.2159	0.0697284	0.0102082	0.17669
ENSMUSG00000026219	Trip12	28.1257	22.9335	29.6761	24.9847	44.7288	33.6206	30.9675	41.8947	16.0822	31.4968	26.8973	25.6291	22.947	25.8167	44.0127	0.0319873	0.71352	0.569079
ENSMUSG00000021569	Trip13	10.4748	9.9486	10.0044	11.8495	9.25953	9.29728	8.18329	10.545	7.75504	8.76468	8.64322	8.37848	6.97099	8.71467	9.95728	0.105768	0.00919448	0.127905
ENSMUSG00000035898	Uba6	7.18513	6.44423	9.17039	7.09937	11.5938	9.3506	9.84451	13.0505	4.96568	8.86299	7.63546	6.46114	6.2055	7.13991	8.15142	0.017742	0.64724	0.720036
ENSMUSG00000078578	Ube2d3	86.6321	67.5174	73.7135	85.905	110.1	84.9426	87.9975	101.988	51.6913	75.2152	84.2163	68.9737	79.7825	74.5827	79.618	0.0586568	0.355404	0.933189
ENSMUSG00000025878	Uimc1	10.8948	13.2059	12.5582	14.0007	10.6626	11.8861	7.54814	11.5072	9.94255	11.5942	10.3681	11.6949	8.46738	11.7439	11.0036	0.11172	0.0741412	0.136888
ENSMUSG00000029591	Ung	7.51898	6.62539	6.80667	9.86586	5.50027	5.0715	4.33139	5.16873	2.401	3.18704	3.90508	2.86748	4.46163	7.58257	6.90846	0.0309541	0.00454395	0.311923
ENSMUSG00000045210	Vcpip1	3.73288	3.47328	4.72451	4.4862	6.12631	5.03652	5.33593	6.67929	3.1121	4.653	3.87702	4.03727	3.88527	4.05435	4.43773	0.0133297	0.686611	0.952158
ENSMUSG00000024283	Wac	21.0514	17.3891	22.7174	20.2729	36.7389	25.6907	25.3262	29.3028	13.8378	41.7397	23.1133	18.7759	21.024	19.4186	26.7024	0.035857	0.560922	0.472983
ENSMUSG00000040433	Zbtb38	4.6353	4.98492	6.24658	4.05677	7.8698	6.77763	6.88126	8.71884	4.05483	7.99768	5.52675	5.35555	6.24656	4.38132	7.23059	0.00741932	0.463565	0.379311
ENSMUSG00000000552	Zfp385a	16.6678	15.8183	15.5481	21.5301	20.7824	24.029	18.7475	27.3614	12.9218	13.9739	15.7501	13.7172	14.2051	17.8831	19.3278	0.0672556	0.0950512	0.908101
ENSMUSG00000066440	Zfyve26	1.61247	1.34033	2.01765	1.86427	2.76887	2.61597	2.37543	3.39423	1.01958	1.70129	1.44248	1.62226	1.39866	1.57579	1.78516	0.00827612	0.263607	0.540183
ENSMUSG00000027663	Zmat3	17.3826	16.4153	19.045	19.6575	24.3301	22.5945	20.7464	28.8462	13.0526	17.5972	15.0041	14.6946	14.2004	19.1761	19.2509	0.0326781	0.046547	0.772438

## Sheet: RM9 Cellular response to interl
Gene ID	Gene name	Con-03h-1	Con-03h-2	Con-03h-3	Con-03h-4	RT-03h-1	RT-03h-2	RT-03h-3	RT-03h-4	RT-12h-1	RT-12h-2	RT-12h-3	RT-12h-4	RT-24h-1	RT-24h-2	RT-24h-3	RT-03h_vs_Con_pval	RT-12h_vs_Con_pval	RT-24h_vs_Con_pval
ENSMUSG00000035385	Ccl2	77.6635	96.152	66.4952	96.6549	96.434	93.9003	51.3293	88.7548	73.0397	94.722	93.2498	78.1146	150.415	134.137	138.806	0.903454	0.955063	0.00155639
ENSMUSG00000000982	Ccl3	1.73648	1.88819	1.86627	1.18744	2.05902	1.80316	1.58887	2.4117	2.44481	2.48115	2.23033	2.59801	5.25017	3.10586	3.56347	0.266232	0.0116086	0.0637292
ENSMUSG00000018930	Ccl4	2.52618	2.91781	2.13984	1.86256	1.84336	1.2687	1.10867	2.04436	2.57875	2.21866	2.19739	3.35641	5.48445	3.49541	4.18661	0.0480799	0.548364	0.0578369
ENSMUSG00000035042	Ccl5	11.6776	12.7806	9.32771	15.5737	7.58981	8.16867	5.84884	9.99858	14.3155	4.29868	6.95797	5.07107	11.2578	9.21559	7.91299	0.0339641	0.138371	0.136405
ENSMUSG00000035373	Ccl7	31.3138	36.0946	19.7206	46.5922	24.3722	31.5099	17.7314	35.3511	29.6163	27.0418	37.5228	23.7989	63.1854	66.4111	43.0802	0.401951	0.562006	0.0570982
ENSMUSG00000031778	Cx3cl1	4.63656	3.71163	3.68685	4.51529	5.09626	4.67744	3.00542	5.00138	2.97873	4.18545	5.41278	3.90949	4.21503	4.76518	4.66828	0.602935	0.978585	0.237571
ENSMUSG00000026193	Fn1	315.167	273.51	430.148	294.076	440.855	399.116	376.801	423.921	206.316	429.37	362.37	386.201	233.655	562.642	341.385	0.0966522	0.776887	0.660179
ENSMUSG00000025746	Il6	0.503205	0.355521	0.541385	0.340335	0.294261	0.575245	0.192114	0.158642	0.43304	0.393133	0.523875	0.494663	0.494324	0.596354	0.531174	0.284555	0.677615	0.139468
ENSMUSG00000022126	Irg1	0.663367	0.503026	0.325543	0.541499	0.573737	0.394646	0.162807	0.453576	0.334648	0.472004	0.333345	0.177703	1.4806	0.72125	0.950327	0.352867	0.101356	0.126949
ENSMUSG00000040026	Saa3	13.5603	4.08304	3.95068	2.93059	7.06898	2.73954	2.2004	2.19784	1.5772	3.54785	3.23082	4.40019	7.02271	13.5373	4.97502	0.398856	0.325926	0.537843

## Sheet: RM9 Neutrophil chemotaxis
Gene ID	Gene name	Con-03h-1	Con-03h-2	Con-03h-3	Con-03h-4	RT-03h-1	RT-03h-2	RT-03h-3	RT-03h-4	RT-12h-1	RT-12h-2	RT-12h-3	RT-12h-4	RT-24h-1	RT-24h-2	RT-24h-3	RT-03h_vs_Con_pval	RT-12h_vs_Con_pval	RT-24h_vs_Con_pval
ENSMUSG00000035385	Ccl2	77.6635	96.152	66.4952	96.6549	96.434	93.9003	51.3293	88.7548	73.0397	94.722	93.2498	78.1146	150.415	134.137	138.806	0.903454	0.955063	0.00155639
ENSMUSG00000004814	Ccl24	4.78781	5.82106	12.4776	4.04796	5.245	7.7937	15.3105	5.1439	7.4979	1.37038	4.37557	12.8008	11.1069	22.27	18.4738	0.624502	0.933268	0.0617367
ENSMUSG00000023235	Ccl25	1.85631	1.74607	2.48072	1.74229	1.14323	2.23496	1.65571	2.44706	2.22629	1.33347	2.20019	1.68164	2.93983	2.12069	3.66994	0.812167	0.743059	0.154481
ENSMUSG00000000982	Ccl3	1.73648	1.88819	1.86627	1.18744	2.05902	1.80316	1.58887	2.4117	2.44481	2.48115	2.23033	2.59801	5.25017	3.10586	3.56347	0.266232	0.0116086	0.0637292
ENSMUSG00000018930	Ccl4	2.52618	2.91781	2.13984	1.86256	1.84336	1.2687	1.10867	2.04436	2.57875	2.21866	2.19739	3.35641	5.48445	3.49541	4.18661	0.0480799	0.548364	0.0578369
ENSMUSG00000018927	Ccl6	99.4444	70.0946	77.4315	64.124	34.8173	83.869	71.4668	71.2459	79.3428	36.9545	98.5726	103.174	170.612	126.008	123.139	0.383155	0.92282	0.0362396
ENSMUSG00000035373	Ccl7	31.3138	36.0946	19.7206	46.5922	24.3722	31.5099	17.7314	35.3511	29.6163	27.0418	37.5228	23.7989	63.1854	66.4111	43.0802	0.401951	0.562006	0.0570982
ENSMUSG00000019122	Ccl9	23.9408	17.3406	13.1203	17.7563	9.52418	20.8674	14.0019	18.2075	18.9153	14.3221	28.5422	22.8354	41.1493	32.6158	29.2754	0.501158	0.440598	0.022124
ENSMUSG00000058427	Cxcl2	0.664312	0.852463	0.620611	0.102397	2.8856	0.763051	0.376831	0.365843	0.897027	2.68252	1.58233	1.44577	2.4074	1.44338	2.30201	0.444897	0.0541085	0.0213203
ENSMUSG00000029379	Cxcl3	1.53679	0.749288	1.46689	0.306306	3.32848	1.90383	1.06176	0.55638	0.941375	3.51943	3.0256	1.73593	6.64272	3.78876	5.70852	0.354836	0.115417	0.0245448
ENSMUSG00000029373	Pf4	64.1585	45.2931	45.8992	40.316	32.3671	44.6693	33.9111	28.1101	34.2282	28.2132	52.2442	36.7702	67.1077	86.3845	63.9865	0.0722643	0.181789	0.0539861
ENSMUSG00000029372	Ppbp	2.1542	0.853928	2.76491	0.55522	3.84765	1.7583	3.55149	1.02414	2.10289	3.63396	3.73445	2.77457	5.68105	4.72445	7.04692	0.310142	0.067531	0.0070269
ENSMUSG00000042265	Trem1	1.07177	1.35709	1.10369	0.927147	1.25573	1.92351	1.00107	1.29182	0.865016	1.5854	1.57947	1.48003	2.59933	1.07005	2.59628	0.302618	0.240531	0.192932
