# Supplementary figures and images for: Radiation-Induced Innate Neutrophil Response in Tumor Is Mediated by the CXCLs/CXCR2 Axis
Source: MDPI journal article supplement (doi:10.3390/cancers15235686), 2023-12-01

1. The original blots for Figure 5E.

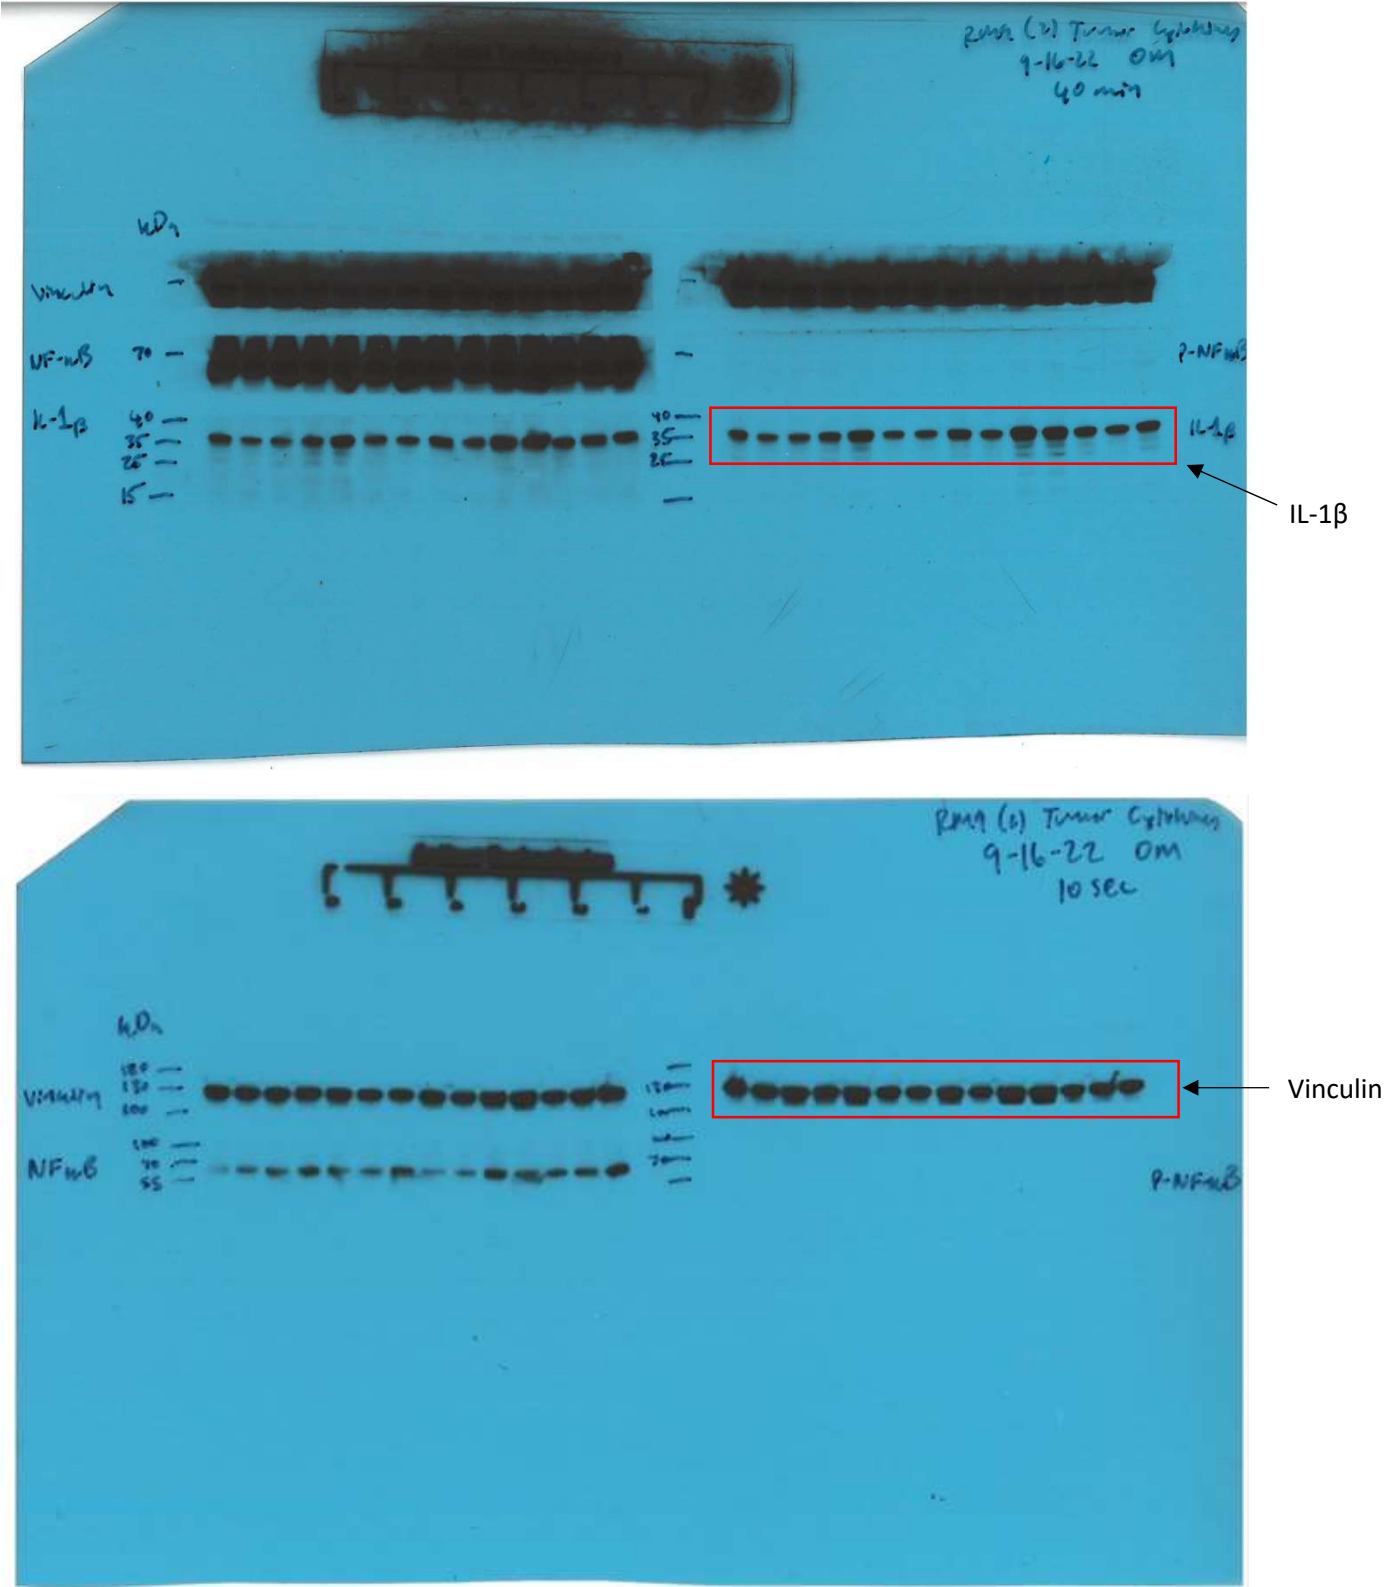

2. The original blots for Figure 5F.

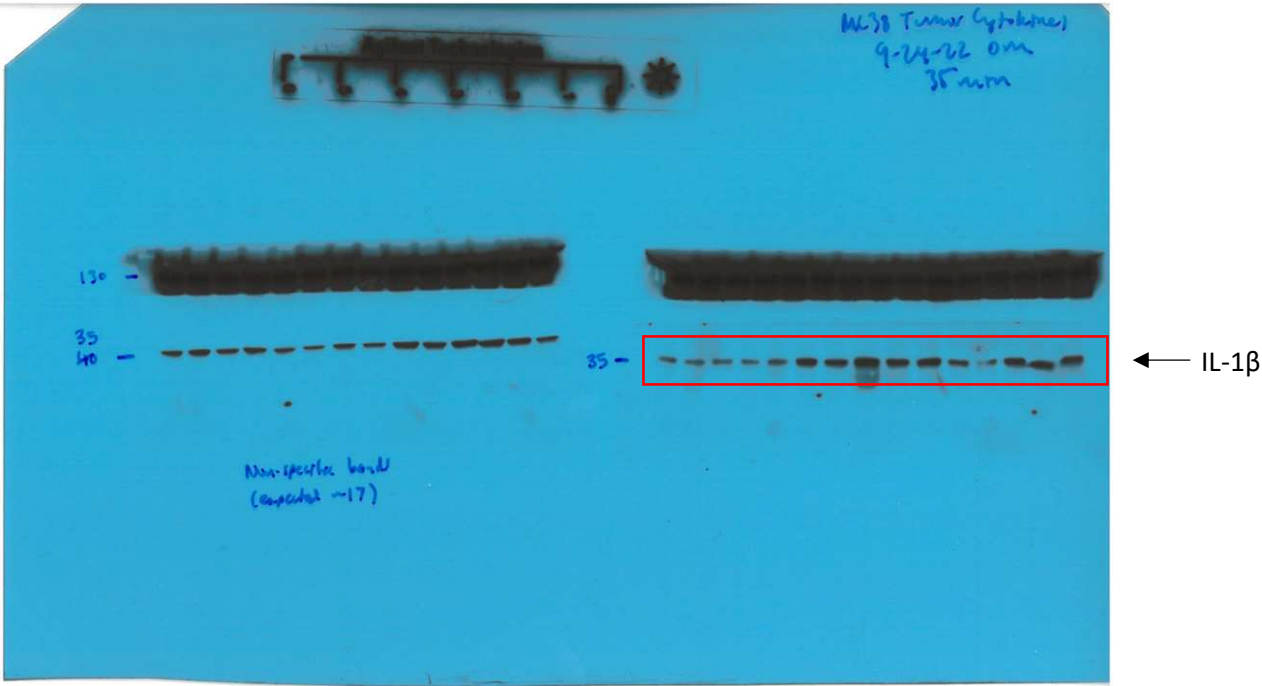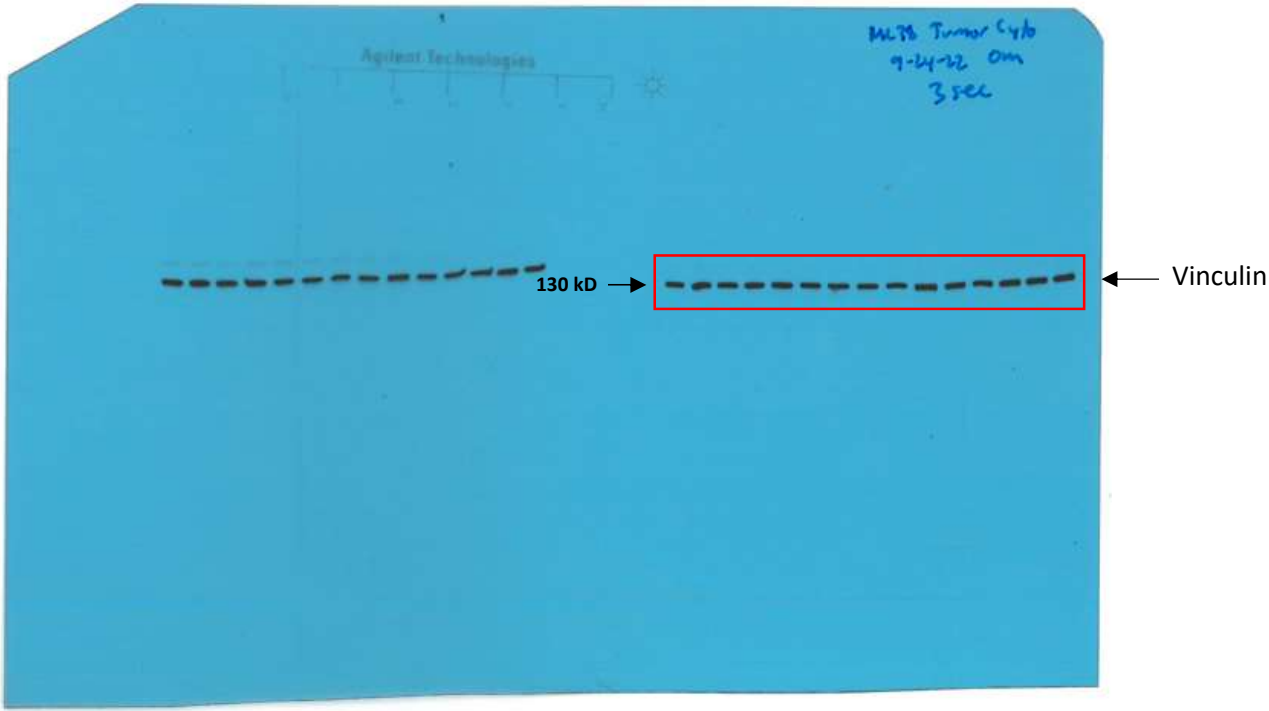

3. The original blots for Figure S7.

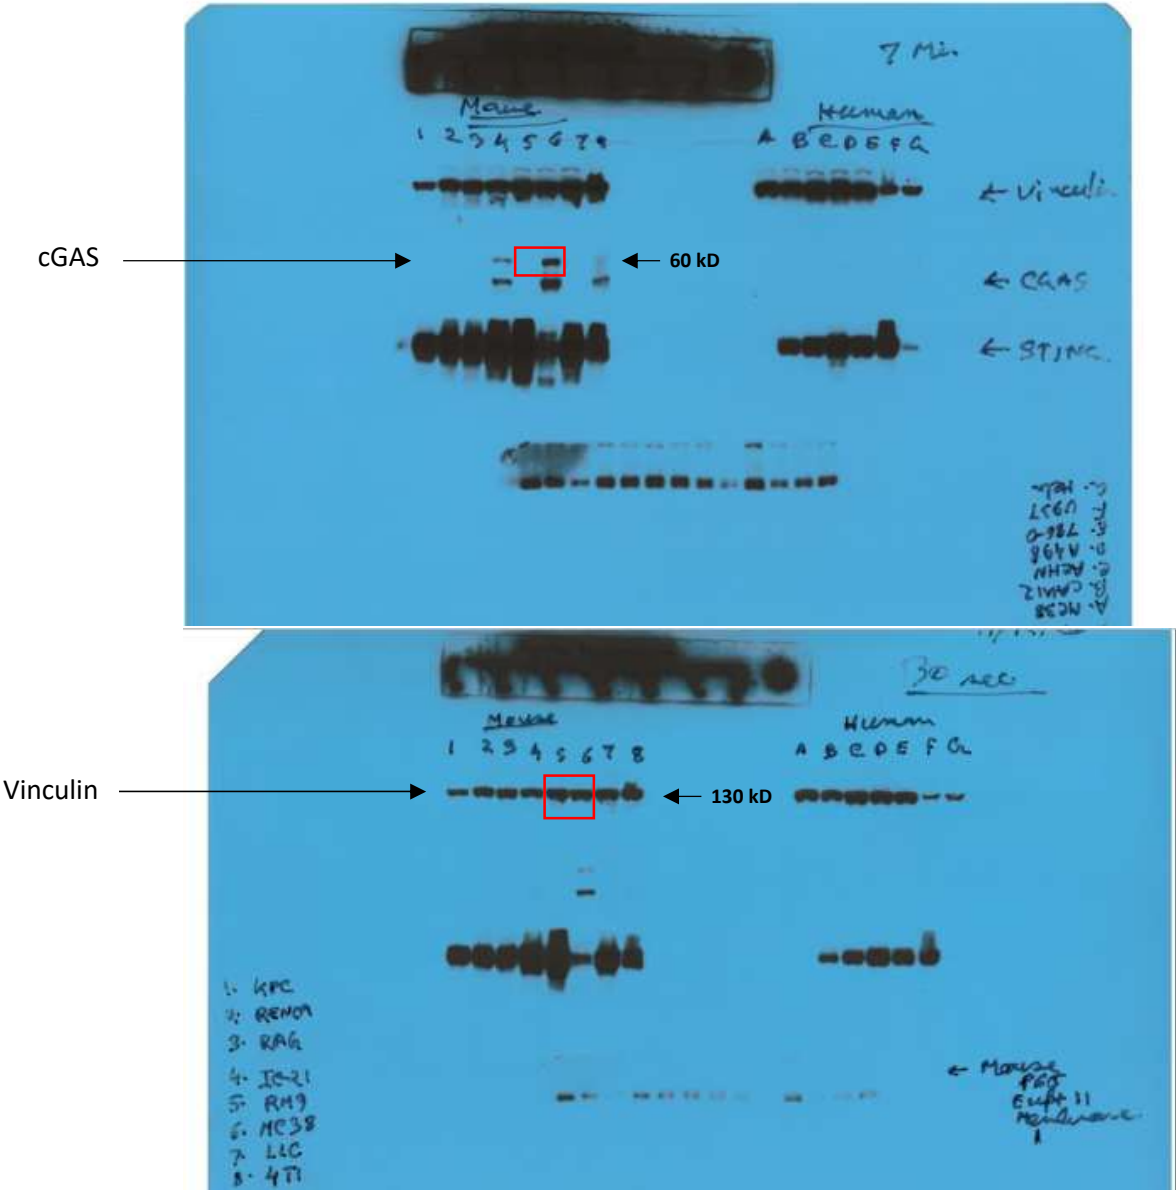

Supplement: s1 [file s1]
